# Supplementary material for: Diagnostic accuracy and potential covariates for machine learning to identify IDH mutations in glioma patients: evidence from a meta-analysis
Source: Springer Nature journal article supplement (doi:10.1007/s00330-020-06717-9), 2020-03-19
Supplement: MOESM1 [file 17815278]

**Supplementary Material**

***Literature search***

The detailed study selection process is described in Fig. 1. A total of 116 studies were retrieved and 44 duplicates were removed. After screening the titles and abstracts, 56 articles remained, of which 18 articles were further excluded for the following reasons: outside the topic of interest (n = 9), review article (n = 6), and conference article (n = 3). Next, full-text reviews of 38 potentially eligible articles were performed, and 29 articles were excluded for the following reasons: partially overlapping patient cohorts (n = 12), articles including only IDH mutated gliomas (n = 6), and insufficient data (n = 11). Finally, a total of nine original articles (1-9) including 996 patients with glioma were included and analysed in this study.

One study analysed the diagnostic accuracy of PET or PET/MRI in prediction of IDH mutation in patients with glioma, and only the PET/MRI data were included.

***Data extraction and quality assessment***

All of the selected studies had a retrospective design. Five of them included gliomas of WHO grades II, III, and IV (2; 3; 5; 8; 9); one study included grade II and III gliomas (1); one study included grade III and IV gliomas (6); one study included only grade II gliomas (7); and one study included only grade IV gliomas (4). All of the selected studies used genomic sequencing analysis and/or immunohistochemistry as the reference standard, with immunohistochemistry being performed to assess mutated *IDH1* (R132H) protein expression and genomic sequence analysis being performed to identify mutation in the *IDH1* or *IDH2* genes.

The QUADAS-2 scores are shown in Fig. 2 and Supplementary Materials. Most included studies were regarded as having a moderate risk of bias with low concerns regarding applicability. For the patient selection domain, one study was considered to show a high risk of bias due to non-consecutive or random patient enrolment (3). Two studies were considered as having an unclear risk since they did not clarify how patients were enrolled (1; 4). For the index test domain, six studies were considered to have an unclear risk, because two of them lacked pre-specified thresholds (1; 6), and the other four studies not only lacked pre-specified thresholds but also lacked clear descriptions of the reference standards (2; 3; 7; 8). Further, for the reference standard domain, three studies were classified as having an unclear risk since they did not clarify whether the reference standard results were interpreted blinded to the reference standards (1; 3; 4). Lastly, for the domain of flow and timing, three studies were considered to show a high risk (4; 6; 7) because they did not clarify the interval between the index test and the reference standard or clarify whether all the patients were included in the studies. One study was classified as showing an unclear risk since it did not provide a clear description of the interval between the index test and the reference standard (3).

**Reference**

1. Zhang X, Tian Q, Wang L, Liu Y, Li BJ, et al (2018) Radiomics Strategy for Molecular Subtype Stratification of Lower-Grade Glioma: Detecting IDH and TP53 Mutations Based on Multimodal MRI. Journal of Magnetic Resonance Imaging 48:916-26

2. Lohmann P, Lerche C, Bauer EK, Steger J, Stoffels G, et al (2018) Predicting IDH genotype in gliomas using FET PET radiomics. Scientific reports 8:13328

3. Liang S, Zhang RG, Liang DY, Song TC, Ai T, et al (2018) Multimodal 3D DenseNet for IDH Genotype Prediction in Gliomas. Genes 9

4. Li ZC, Bai H, Sun Q, Zhao Y, Lv Y, et al (2018) Multiregional radiomics profiling from multiparametric MRI: Identifying an imaging predictor of IDH1 mutation status in glioblastoma. Cancer medicine 7:5999-6009

5. De Looze C, Beausang A, Cryan J, Loftus T, Buckley PG, et al (2018) Machine learning: a useful radiological adjunct in determination of a newly diagnosed glioma's grade and IDH status. Journal of neuro-oncology

6. Chen L, Zhang H, Lu J, Thung K, Aibaidula A, et al (2018) Multi-Label Nonlinear Matrix Completion With Transductive Multi-Task Feature Selection for Joint MGMT and IDH1 Status Prediction of Patient With High-Grade Gliomas. IEEE transactions on medical imaging 37:1775-87

7. Yu J, Shi Z, Lian Y, Li Z, Liu T, et al (2017) Noninvasive IDH1 mutation estimation based on a quantitative radiomics approach for grade II glioma. European radiology 27:3509-22

8. Choi KS, Choi SH, Jeong B (2019) Prediction of IDH genotype in gliomas with dynamic susceptibility contrast perfusion MR imaging using an explainable recurrent neural network. Neuro-oncology

9. Tan Y, Zhang ST, Wei JW, Dong D, Wang XC, et al (2019) A radiomics nomogram may improve the prediction of IDH genotype for astrocytoma before surgery. European radiology 29:3325-37

**Supplement Fig. S1** Deeks funnel plot with a *P* value of 0.597, which indicated a low likelihood of publication bias
